# Supplementary material for: Avacincaptad pegol for geographic atrophy secondary to age-related macular degeneration: 18-month findings from the GATHER1 trial
Source: Springer Nature journal article supplement (doi:10.1038/s41433-023-02497-w), 2023-03-24
Supplement: MOESM1 [file 41433_2023_2497_MOESM1_ESM.pdf]

**Supplemental Table 1: Demographics and Baseline Characteristics of the Intent-to-Treat Participants**

| <b>Cohort</b>                                   | <b>Avacincaptad Pegol 2 mg<br/>n = 67</b> | <b>Sham*<br/>n = 110</b> | <b>Avacincaptad Pegol 4 mg<br/>n = 83</b> | <b>Sham†<br/>n = 84</b> |
|-------------------------------------------------|-------------------------------------------|--------------------------|-------------------------------------------|-------------------------|
| <b>Mean Age, Years</b>                          | 78.8                                      | 78.2                     | 79.2                                      | 78.2                    |
| <b>Female Gender, Number (%)</b>                | 45 (67.2)                                 | 79 (71.8)                | 58 (69.9)                                 | 61 (72.6)               |
| <b>Active Smoker, Number (%)</b>                | 25 (37.3)                                 | 36 (32.7)                | 26 (31.3)                                 | 29 (34.5)               |
| <b>Noncenterpoint involving GA‡, Number (%)</b> | 62 (92.5)                                 | 104 (94.5)               | 81 (97.6)                                 | 82 (97.6)               |
| <b>Mean GA Area, mm<sup>2</sup></b>             | 7.33                                      | 7.42                     | 7.90                                      | 7.45                    |
| <b>Mean SQ Root GA Area, mm</b>                 | 2.62                                      | 2.63                     | 2.72                                      | 2.64                    |
| <b>Bilateral GA, Number (%)</b>                 | 67 (100)                                  | 108 (98.2)               | 83 (100)                                  | 83 (98.8)               |
| <b>Hyper FAF (%)</b>                            | 66 (98.5)                                 | 109 (99.1)               | 82 (98.8)                                 | 83 (98.8)               |
| <b>Trickling Pattern, Number (%)</b>            | 12 (18.2)                                 | 20 (18.3)                | 13 (15.9)                                 | 17 (20.5)               |
| <b>Mean BCVA (ETDRS Letters)</b>                | 70.2                                      | 69.0                     | 69.5                                      | 68.3                    |
| <b>Mean LL-BCVA (ETDRS Letters)</b>             | 36.7                                      | 34.5                     | 36.8                                      | 33.9                    |
| <b>LL-VD (ETDRS Letters)</b>                    | 33.5                                      | 34.5                     | 32.7                                      | 34.4                    |

BCVA = best-corrected visual acuity; GA = geographic atrophy; LL-BCVA = low-luminance best-corrected visual acuity; LL-VD = low-luminance visual acuity deficit (BCVA minus LL-BCVA); SD = standard deviation.

\*Sham for 2 mg arm.

†Sham for 4 mg arm.

‡ includes disease in the fovea and outside the fovea but does not involve the foveal center point; refers to observations of baseline images at the Reading Center after participants had been enrolled
